# Supplementary material
Source: publisher site journal article supplement (https://www.spandidos-publications.com/7571/downloadSupplementary)
Supplement: Supplementary file 1 [file downloadSupplementary]

## Sheet: Table SIII
Table SIII. Ferroptosis-related genes (FRGs) obtained from FerrDb and GeneCards (relevance score > 3).
Gene	Resource
RPL8	FerrDb
IREB2	FerrDb
ATP5MC3	FerrDb
CS	FerrDb
EMC2	FerrDb
ACSF2	FerrDb
NOX1	FerrDb
CYBB	FerrDb
NOX3	FerrDb
NOX4	FerrDb
NOX5	FerrDb
DUOX1	FerrDb
DUOX2	FerrDb
G6PD	FerrDb
PGD	FerrDb
VDAC2	FerrDb
PIK3CA	FerrDb
FLT3	FerrDb
SCP2	FerrDb
TP53	FerrDb
ACSL4	FerrDb
LPCAT3	FerrDb
NRAS	FerrDb
KRAS	FerrDb
HRAS	FerrDb
TF	FerrDb
TFRC	FerrDb
TFR2	FerrDb
SLC38A1	FerrDb
SLC1A5	FerrDb
GLS2	FerrDb
GOT1	FerrDb
CARS1	FerrDb
ALOX5	FerrDb
KEAP1	FerrDb
HMOX1	FerrDb
ATG5	FerrDb
ATG7	FerrDb
NCOA4	FerrDb
ALOX12	FerrDb
ALOX12B	FerrDb
ALOX15	FerrDb
ALOX15B	FerrDb
ALOXE3	FerrDb
PHKG2	FerrDb
ACO1	FerrDb
G6PDX	FerrDb
ULK1	FerrDb
ATG3	FerrDb
ATG4D	FerrDb
BECN1	FerrDb
MAP1LC3A	FerrDb
GABARAPL2	FerrDb
GABARAPL1	FerrDb
ATG16L1	FerrDb
WIPI1	FerrDb
WIPI2	FerrDb
SNX4	FerrDb
ATG13	FerrDb
ULK2	FerrDb
SAT1	FerrDb
EGFR	FerrDb
MAPK3	FerrDb
MAPK1	FerrDb
BID	FerrDb
ZEB1	FerrDb
DPP4	FerrDb
CDKN2A	FerrDb
PEBP1	FerrDb
SOCS1	FerrDb
CDO1	FerrDb
MYB	FerrDb
MAPK8	FerrDb
MAPK9	FerrDb
CHAC1	FerrDb
MAPK14	FerrDb
LINC00472	FerrDb
PRKAA2	FerrDb
PRKAA1	FerrDb
ELAVL1	FerrDb
BAP1	FerrDb
ABCC1	FerrDb
MIR6852	FerrDb
ACVR1B	FerrDb
TGFBR1	FerrDb
EPAS1	FerrDb
HILPDA	FerrDb
HIF1A	FerrDb
IFNG	FerrDb
ANO6	FerrDb
LPIN1	FerrDb
HMGB1	FerrDb
TNFAIP3	FerrDb
TLR4	FerrDb
ATF3	FerrDb
ATM	FerrDb
YY1AP1	FerrDb
EGLN2	FerrDb
MIOX	FerrDb
TAFAZZIN	FerrDb
MTDH	FerrDb
IDH1	FerrDb
SIRT1	FerrDb
FBXW7	FerrDb
PANX1	FerrDb
DNAJB6	FerrDb
BACH1	FerrDb
LONP1	FerrDb
CD82	FerrDb
IL1B	FerrDb
CTSB	FerrDb
POR	FerrDb
CYB5R1	FerrDb
ELOVL5	FerrDb
FADS1	FerrDb
PTEN	FerrDb
NR1D1	FerrDb
NR1D2	FerrDb
TBK1	FerrDb
IL6	FerrDb
USP7	FerrDb
miR-182-5p	FerrDb
miR-378a-3p	FerrDb
ATF4	FerrDb
AQP3	FerrDb
AQP5	FerrDb
AQP8	FerrDb
LINC00618	FerrDb
MT1DP	FerrDb
PEX10	FerrDb
AGPAT3	FerrDb
PEX12	FerrDb
CHP1	FerrDb
GPAT4	FerrDb
BRPF1	FerrDb
OSBPL9	FerrDb
INTS2	FerrDb
MMD	FerrDb
CYP4F8	FerrDb
MLLT1	FerrDb
TTPA	FerrDb
GRIA3	FerrDb
EPT1	FerrDb
POM121L12	FerrDb
LIG3	FerrDb
AEBP2	FerrDb
AGPS	FerrDb
CDCA3	FerrDb
PEX2	FerrDb
PEX6	FerrDb
TIMM9	FerrDb
DCAF7	FerrDb
LCE2C	FerrDb
FAR1	FerrDb
PHF21A	FerrDb
SMAD7	FerrDb
LYRM1	FerrDb
AMN	FerrDb
PEX3	FerrDb
MTCH1	FerrDb
ACADSB	FerrDb
PVT1	FerrDb
hsa_circ_0008367	FerrDb
SLC39A14	FerrDb
MAP3K11	FerrDb
GSK3B	FerrDb
BRD7	FerrDb
SLC25A28	FerrDb
MFN2	FerrDb
SLC11A2	FerrDb
ZFAS1	FerrDb
TSC1	FerrDb
TGFB1	FerrDb
SNCA	FerrDb
SIRT3	FerrDb
CGAS	FerrDb
STING1	FerrDb
HDDC3	FerrDb
MIR761	FerrDb
MDM2	FerrDb
MDM4	FerrDb
MIR214	FerrDb
DLD	FerrDb
WWTR1	FerrDb
PRKCA	FerrDb
LGMN	FerrDb
SMPD1	FerrDb
MYCN	FerrDb
IFNA1	FerrDb
IFNA2	FerrDb
IFNA4	FerrDb
IFNA5	FerrDb
IFNA6	FerrDb
IFNA7	FerrDb
IFNA8	FerrDb
IFNA10	FerrDb
IFNA13	FerrDb
IFNA14	FerrDb
IFNA16	FerrDb
IFNA17	FerrDb
IFNA21	FerrDb
SMG9	FerrDb
PPARG	FerrDb
MIR335	FerrDb
SNX5	FerrDb
PAQR3	FerrDb
MICU1	FerrDb
TOR2A	FerrDb
MIR375	FerrDb
MAP3K14	FerrDb
CircKDM4C	FerrDb
MIR324	FerrDb
QSOX1	FerrDb
MIB2	FerrDb
CLTRN	FerrDb
KLF2	FerrDb
MIR5096	FerrDb
HOTAIR	FerrDb
H19	FerrDb
FOXO4	FerrDb
YTHDC2	FerrDb
DDR2	FerrDb
SLC39A7	FerrDb
TRIM46	FerrDb
ACSL1	FerrDb
KDM5A	FerrDb
TRIM21	FerrDb
DPEP1	FerrDb
CYGB	FerrDb
IDO1	FerrDb
GSTZ1	FerrDb
GJA1	FerrDb
SLC7A11	FerrDb
PGRMC1	FerrDb
CIRBP	FerrDb
circPSEN1	FerrDb
USP11	FerrDb
YAP1	FerrDb
MIR135B	FerrDb
TRIM26	FerrDb
NDRG1	FerrDb
MIR302A	FerrDb
ASMTL-AS1	FerrDb
FADS2	FerrDb
PIEZO1	FerrDb
LIFR	FerrDb
PTPN6	FerrDb
MIR15A	FerrDb
EGR1	FerrDb
ADAM23	FerrDb
ARHGEF26-AS1	FerrDb
CPEB1	FerrDb
COX4I2	FerrDb
lncRNA AABR07017145.1	FerrDb
TIMP1	FerrDb
KDM6B	FerrDb
METTL14	FerrDb
MIB1	FerrDb
KDM5C	FerrDb
MEG3	FerrDb
CCDC6	FerrDb
CFL1	FerrDb
MIR539	FerrDb
KMT2D	FerrDb
GPX4	FerrDb
AKR1C1	FerrDb
AKR1C2	FerrDb
AKR1C3	FerrDb
RB1	FerrDb
HSPB1	FerrDb
HSF1	FerrDb
GCLC	FerrDb
NFE2L2	FerrDb
SQSTM1	FerrDb
NQO1	FerrDb
FTH1	FerrDb
MUC1	FerrDb
SLC3A2	FerrDb
MT1G	FerrDb
SLC40A1	FerrDb
CISD1	FerrDb
FANCD2	FerrDb
FTMT	FerrDb
HSPA5	FerrDb
HELLS	FerrDb
SCD	FerrDb
SRC	FerrDb
STAT3	FerrDb
PML	FerrDb
MTOR	FerrDb
NFS1	FerrDb
TP63	FerrDb
CDKN1A	FerrDb
MIR137	FerrDb
ENPP2	FerrDb
FH	FerrDb
CISD2	FerrDb
MIR9-1	FerrDb
MIR9-2	FerrDb
MIR9-3	FerrDb
CBS	FerrDb
ISCU	FerrDb
ACSL3	FerrDb
OTUB1	FerrDb
CD44	FerrDb
LINC00336	FerrDb
BRD4	FerrDb
PRDX6	FerrDb
MIR17	FerrDb
SESN2	FerrDb
NF2	FerrDb
ARNTL	FerrDb
JUN	FerrDb
CA9	FerrDb
TMBIM4	FerrDb
PLIN2	FerrDb
MIR212	FerrDb
Fer1HCH	FerrDb
AIFM2	FerrDb
LAMP2	FerrDb
ZFP36	FerrDb
PROM2	FerrDb
CHMP5	FerrDb
CHMP6	FerrDb
CAV1	FerrDb
GCH1	FerrDb
DAZAP1	FerrDb
PIR	FerrDb
FTL	FerrDb
HCAR1	FerrDb
SLC16A1	FerrDb
RRM2	FerrDb
NR4A1	FerrDb
RPTOR	FerrDb
SREBF1	FerrDb
SREBF2	FerrDb
FZD7	FerrDb
P4HB	FerrDb
NT5DC2	FerrDb
BCAT2	FerrDb
PLA2G6	FerrDb
MIR424	FerrDb
PARK7	FerrDb
FXN	FerrDb
SUV39H1	FerrDb
ATF2	FerrDb
ACOT1	FerrDb
ALDH3A2	FerrDb
STK11	FerrDb
FNDC5	FerrDb
CircIL4R	FerrDb
CDH1	FerrDb
NEDD4L	FerrDb
BRD2	FerrDb
BRD3	FerrDb
BRDT	FerrDb
DECR1	FerrDb
GLRX5	FerrDb
NCOA3	FerrDb
NR5A2	FerrDb
PANX2	FerrDb
RHEBP1	FerrDb
TFAP2A	FerrDb
CP	FerrDb
ARF6	FerrDb
GDF15	FerrDb
ABHD12	FerrDb
PPP1R13L	FerrDb
TFAM	FerrDb
KDM3B	FerrDb
RNF113A	FerrDb
AHCY	FerrDb
circ-TTBK2	FerrDb
MIR522	FerrDb
IDH2	FerrDb
PPARA	FerrDb
NOS2	FerrDb
SIAH2	FerrDb
RELA	FerrDb
VDR	FerrDb
NEDD4	FerrDb
PRDX1	FerrDb
AR	FerrDb
MTF1	FerrDb
COPZ1	FerrDb
NUPR1	FerrDb
USP35	FerrDb
NEAT1	FerrDb
PARP1	FerrDb
PARP2	FerrDb
PARP3	FerrDb
PARP4	FerrDb
PARP6	FerrDb
PARP8	FerrDb
PARP9	FerrDb
PARP10	FerrDb
PARP11	FerrDb
PARP12	FerrDb
PARP14	FerrDb
PARP15	FerrDb
PARP16	FerrDb
PDSS2	FerrDb
TXN	FerrDb
SENP1	FerrDb
OIP5-AS1	FerrDb
MIR190A	FerrDb
FGF21	FerrDb
CREB1	FerrDb
CREB3	FerrDb
CREB5	FerrDb
MIR130B	FerrDb
BEX1	FerrDb
ASAH2	FerrDb
FABP4	FerrDb
AKT1S1	FerrDb
MLST8	FerrDb
TYRO3	FerrDb
SIRT6	FerrDb
TMSB4X	FerrDb
TMSB4Y	FerrDb
KIF20A	FerrDb
ECH1	FerrDb
circRHOT1	FerrDb
ETV4	FerrDb
MEG8	FerrDb
VCP	FerrDb
circ_0007142	FerrDb
RBMS1	FerrDb
KDM4A	FerrDb
MGST1	FerrDb
circKIF4A	FerrDb
miR-7-5p	FerrDb
circ_0067934	FerrDb
MPC1	FerrDb
CHMP1A	FerrDb
CAMKK2	FerrDb
SOX2	FerrDb
SRSF9	FerrDb
PROK2	FerrDb
MIR4443	FerrDb
SIRT2	FerrDb
circRNA1615	FerrDb
MIR27A	FerrDb
MIR670	FerrDb
MEF2C	FerrDb
EZH2	FerrDb
PEDS1	FerrDb
ADAMTS13	FerrDb
CDC25A	FerrDb
CircFNDC3B	FerrDb
PPARD	FerrDb
ENO3	FerrDb
LCN2	FerrDb
MARCHF5	FerrDb
TRIB2	FerrDb
DHODH	FerrDb
MIR545	FerrDb
PDK4	FerrDb
CircPVT1	FerrDb
MIR9-3HG	FerrDb
ADIPOQ	FerrDb
circDTL	FerrDb
mmu_circRNA_0000309	FerrDb
PTPN18	FerrDb
ABCC5	FerrDb
CISD3	FerrDb
MS4A15	FerrDb
FURIN	FerrDb
circRHBG	FerrDb
GALNT14	FerrDb
KLHDC3	FerrDb
LINC01833	FerrDb
circGFRA1	FerrDb
MAPKAP1	FerrDb
PRR5	FerrDb
RICTOR	FerrDb
GSTM1	FerrDb
TERT	FerrDb
circ0097009	FerrDb
TMEM161B-DT	FerrDb
circEPSTI1	FerrDb
MIR18A	FerrDb
RARRES2	FerrDb
PTGS2	FerrDb
AIFM2	GeneCards
GPX4	GeneCards
SLC7A11	GeneCards
NFE2L2	GeneCards
TP53	GeneCards
ACSL4	GeneCards
TFRC	GeneCards
NCOA4	GeneCards
TMEM164	GeneCards
HMOX1	GeneCards
FTH1	GeneCards
SLC39A7	GeneCards
SLC3A2	GeneCards
SLC40A1	GeneCards
GCLC	GeneCards
SLC1A5	GeneCards
TRIM7	GeneCards
PCBP2	GeneCards
HSPB1	GeneCards
VDAC3	GeneCards
PCBP1	GeneCards
ALOX15	GeneCards
KEAP1	GeneCards
CBS	GeneCards
IREB2	GeneCards
PLXNB2	GeneCards
AKR1C3	GeneCards
LPCAT3	GeneCards
YAP1	GeneCards
AKR1C1	GeneCards
CISD1	GeneCards
AKR1C2	GeneCards
POR	GeneCards
TRIM26	GeneCards
LCN2	GeneCards
BECN1	GeneCards
ACSL3	GeneCards
FTMT	GeneCards
GCH1	GeneCards
MAP1LC3B	GeneCards
ATF4	GeneCards
PRNP	GeneCards
SAT1	GeneCards
PHKG2	GeneCards
CP	GeneCards
NOX4	GeneCards
MAP1LC3C	GeneCards
SLC11A2	GeneCards
FTL	GeneCards
STEAP3	GeneCards
OTUB1	GeneCards
VDAC2	GeneCards
SLC39A8	GeneCards
MAP1LC3A	GeneCards
DPP4	GeneCards
CYBB	GeneCards
PARK7	GeneCards
ATG5	GeneCards
ATG7	GeneCards
HIF1A	GeneCards
SCD	GeneCards
HSPA5	GeneCards
TUG1	GeneCards
EP300	GeneCards
FBXW7	GeneCards
ACSL1	GeneCards
BACH1	GeneCards
NEDD4L	GeneCards
SIRT3	GeneCards
KRAS	GeneCards
TF	GeneCards
SOCS1	GeneCards
CHAC1	GeneCards
STAT3	GeneCards
TIMP1	GeneCards
HMGB1	GeneCards
SP1	GeneCards
ATL1	GeneCards
WWTR1	GeneCards
IL6	GeneCards
PRDX6	GeneCards
YTHDF2	GeneCards
FANCD2	GeneCards
FABP4	GeneCards
VDAC1	GeneCards
MDM2	GeneCards
PRKAA1	GeneCards
SOCS2	GeneCards
FDFT1	GeneCards
TXNRD1	GeneCards
ACSL5	GeneCards
MYC	GeneCards
